# Supplementary material for: Deferoxamine regulates neuroinflammation and iron homeostasis in a mouse model of postoperative cognitive dysfunction
Source: PubMed Central journal article supplement (PMC5062909; doi:10.1186/s12974-016-0740-2), 2016-10-12

# Supplementa Figure 2.

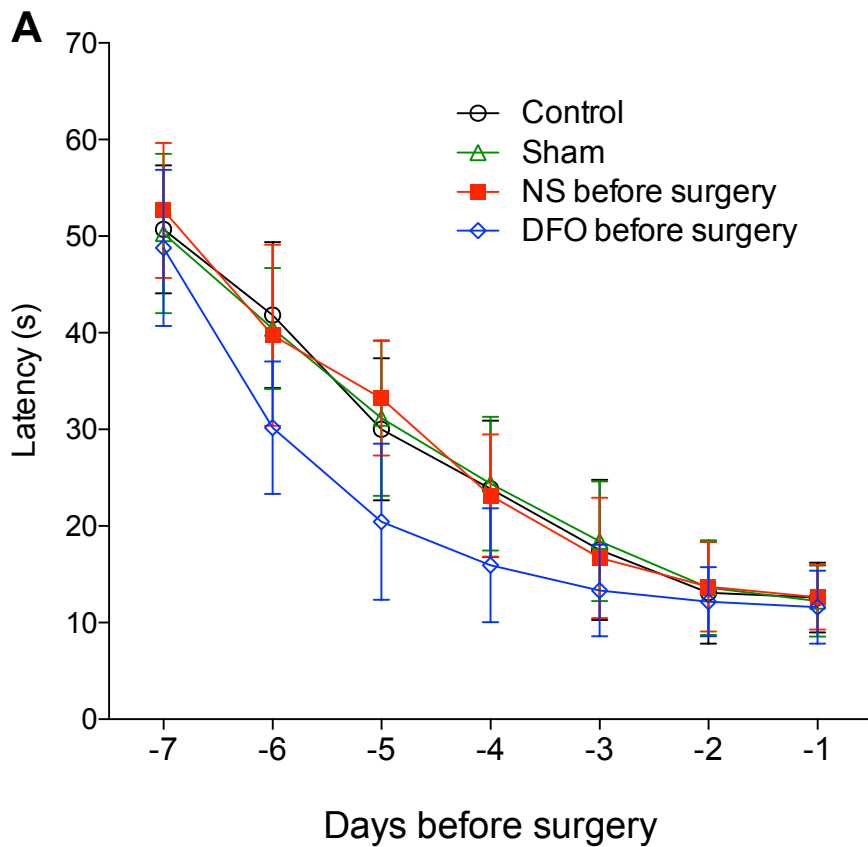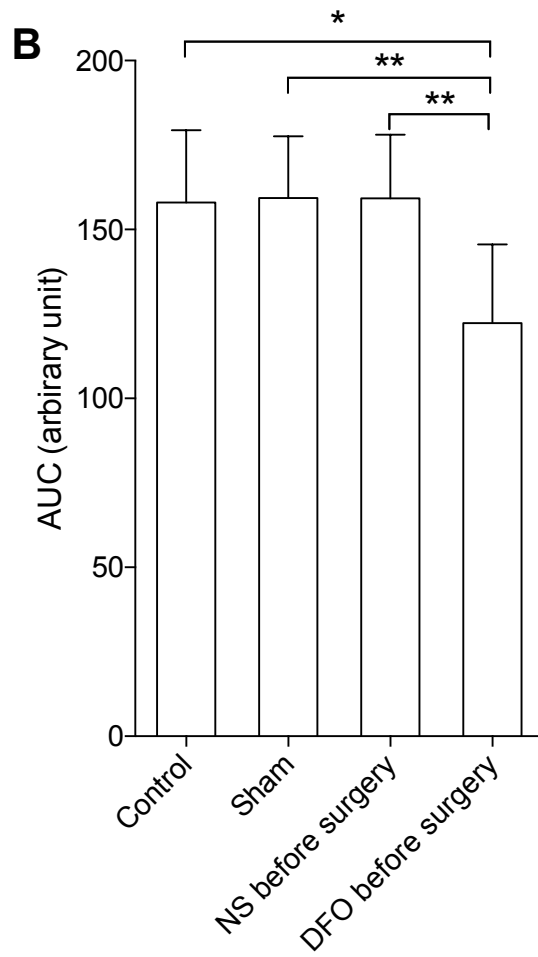

Supplement: 12974_2016_740_MOESM2_ESM.pdf [file 12974_2016_740_MOESM2_ESM.pdf]
