# Supplementary material for: Deferoxamine regulates neuroinflammation and iron homeostasis in a mouse model of postoperative cognitive dysfunction
Source: Springer Nature journal article supplement (doi:10.1186/s12974-016-0740-2), 2016-10-12

# Supplemental Figure 1

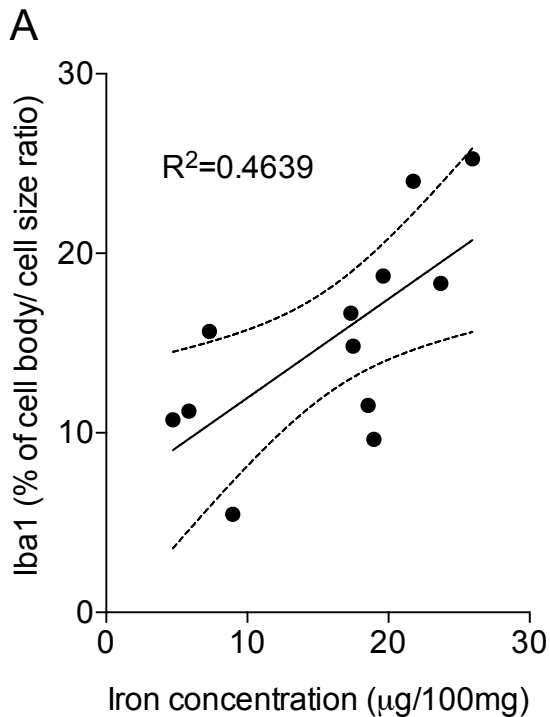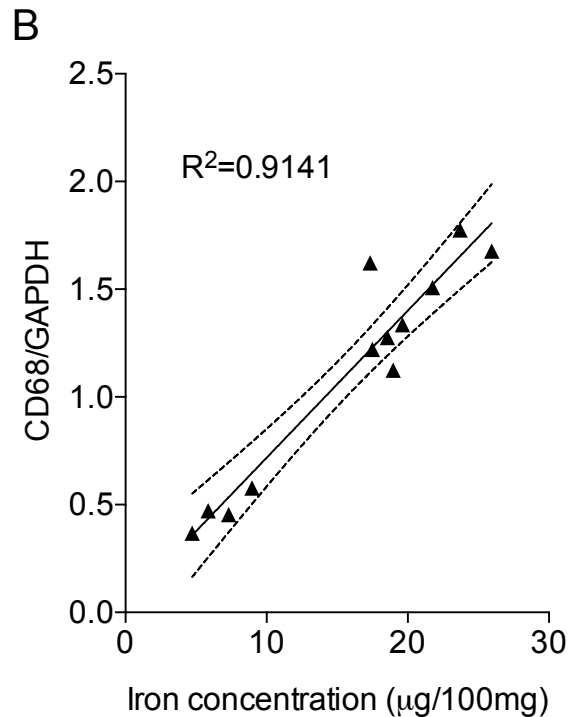

Supplement: MOESM1 [file 10864586]
